# Supplementary material for: Effect of a sulfur and nitrogen dual-doped Fe–N–S electrocatalyst for the oxygen reduction reaction
Source: Royal Society of Chemistry journal article supplement (doi:10.1039/c7ta05030e), 2017-01-01
Supplement: c7ta05030e1.pdf [file c7ta05030e1.pdf]

## Electronic Supplementary Information

### **Effects of sulfur and nitrogen dual-doped Fe-N-S electrocatalyst for oxygen reduction in alkaline media**

Hsin-Chih Huang,<sup>a</sup> Yu-Chuan Lin,<sup>a</sup> Sun-Tang Chang,<sup>b</sup> Chia-Chi Liu,<sup>a</sup> Kai-Chin

Wang,<sup>a</sup> Huan-Ping Jhong,<sup>a</sup> Jyh-Fu Lee,<sup>b</sup> and Chen-Hao Wang<sup>\*a</sup>

<sup>a</sup> *Department of Materials Science and Engineering, National Taiwan University of Science and Technology, Taipei 10607, Taiwan.*

<sup>b</sup> *National Synchrotron Radiation Research Center, Hsinchu 30076, Taiwan*

*\*Corresponding author, E-mail: [chwang@mail.ntust.edu.tw](mailto:chwang@mail.ntust.edu.tw)*

*Tel: +886-2-2730-3715; Fax: +886-2-2737-6544*

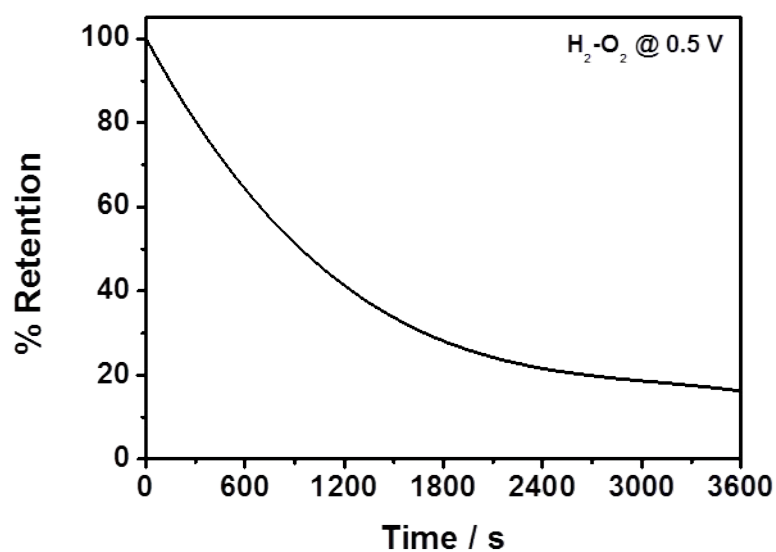

Fig. S1 The retention of Fe-M-LA/C-700 kept by constant potential of 0.5 V in H<sub>2</sub>-O<sub>2</sub> AEMFC durability test.

**Table S1** The elemental content for Fe-M-LA/C-700 from XPS fitting results.

| Catalyst      | Fe 2p atomic% | N 1s atomic% | S 2p atomic% | C 1s atomic% |
|---------------|---------------|--------------|--------------|--------------|
| Fe-M-LA/C-700 | 0.87          | 6.01         | 3.46         | 89.66        |

**Table S2** The BET surface area and average pore size of Fe-M-LA/C-700, Fe-M/C-700, and Fe-LA/C-700.

| Catalyst      | BET surface area / m <sup>2</sup> g <sup>-1</sup> | Average pore size / nm |
|---------------|---------------------------------------------------|------------------------|
| Fe-M-LA/C-700 | 199.7                                             | 7.4                    |
| Fe-M/C-700    | 155.2                                             | 7.5                    |
| Fe-LA/C-700   | 113.7                                             | 9.4                    |

(a)

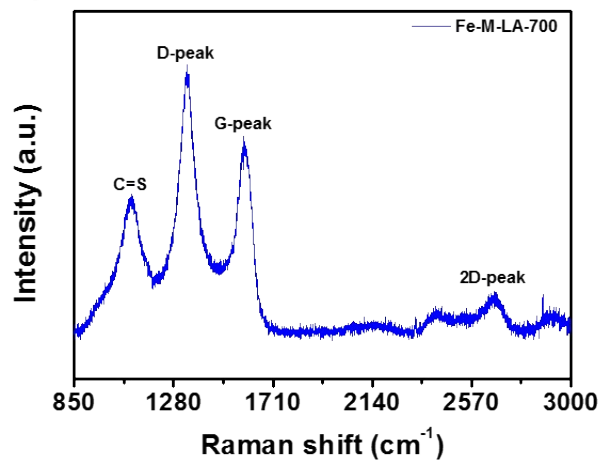

(b)

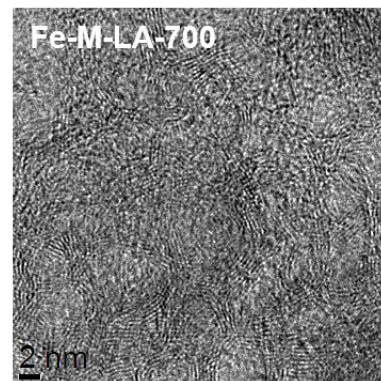

Fig. S2 (a) Raman spectrum and (b) TEM image of Fe-M-LA-700.
